# Supplementary material
Source: PubMed Central journal article supplement (PMC6943824)
Supplement: NIHMS1064607-supplement-1.pdf [file NIHMS1064607-supplement-1.pdf]

Supporting Information for “A Microfluidic Chip with Integrated Electrophoretic Immunoassay for Investigating Cell-Cell Interactions”

Microfluidic Capillary Electrophoresis Immunoassay

Figure S-1. Microfluidic chip channel layout.

Figure S-2. Modeling of flow and NEFA distribution in chips.

Figure S-3. Measurements of NEFAs by enzyme assay.

## **Microfluidic Capillary Electrophoresis Immunoassay**

In this work, extensive use is made of a microchip based immunoassay to monitor insulin secretion. competitive assays encompass unlabeled antibody (Ab), the target antigen (Ag) and a labeled analog of the antigen (Ag\*) where the two forms of antigen compete for binding sites on antibody. Determination of the distribution of bound and free species containing a labeled component (detectable) is applied for quantification, where separation of bound and free species is essential. As previously measured,  $K_d$  for bovine insulin with monoclonal anti-insulin C-terminal pentapeptide of  $\beta$ -chain is 0.52 nM.<sup>1</sup>

Figure S-1

**A**

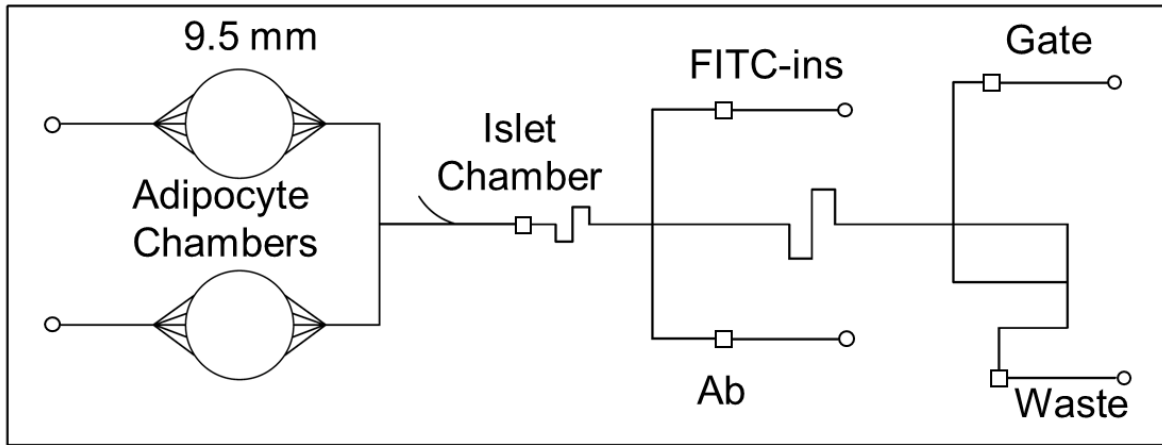

**B**

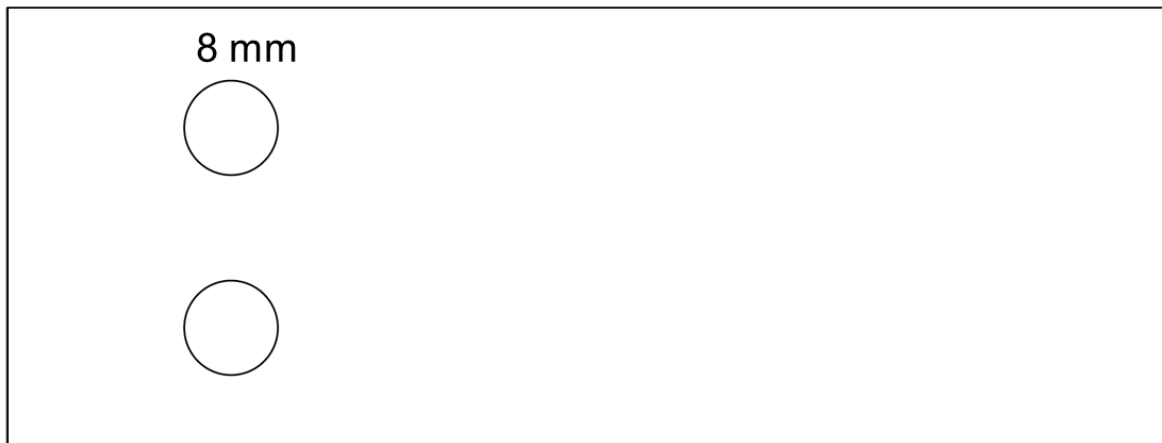

1 cm

Figure S-2

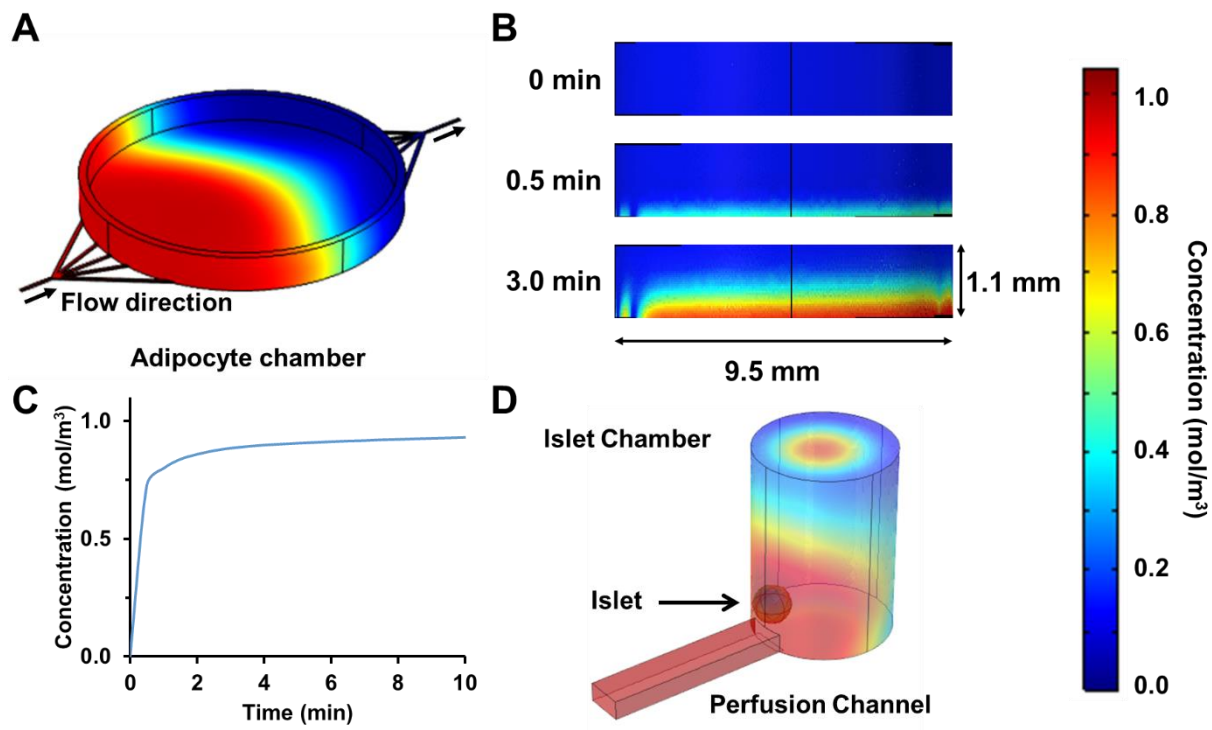

Figure S-3

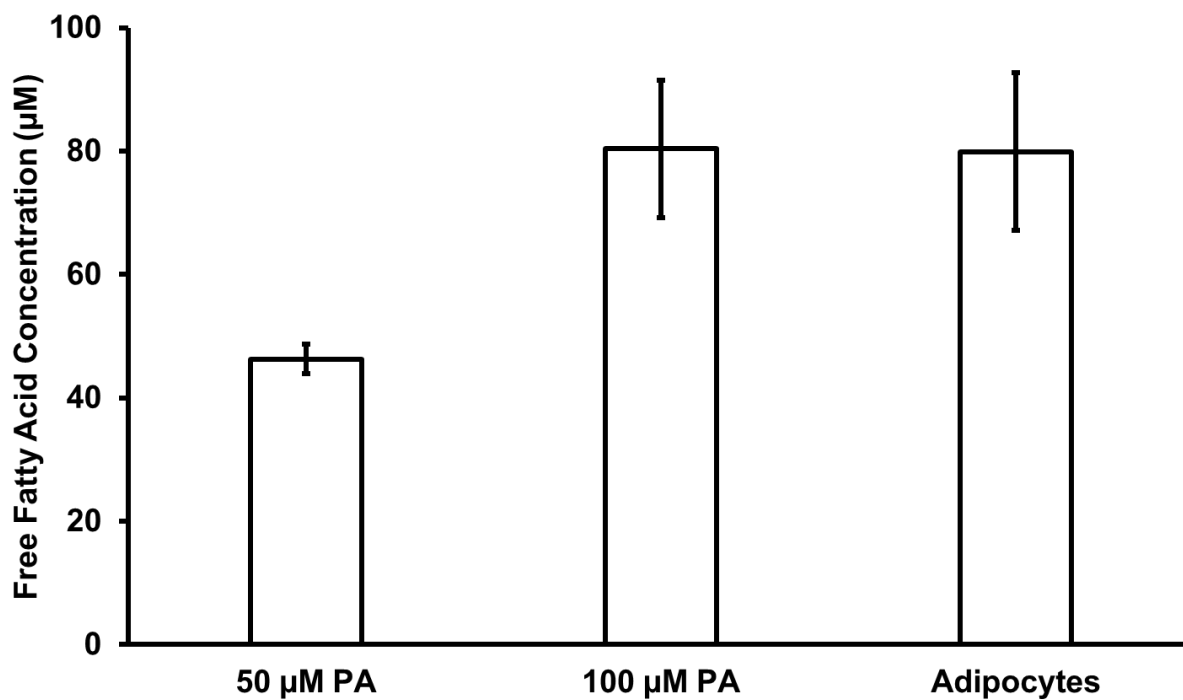

**Reference**

- (1) Tao, L.; Kennedy, R. T. *Electrophoresis* **1997**, *18*, 112–117.
